# Supplementary material for: Detection in LA-ICPMS: construction and performance evaluation of decision rules
Source: Royal Society of Chemistry journal article supplement (doi:10.1039/c5ja00378d), 2016-01-01
Supplement: c5ja00378d1.zip [file c5ja00378d1.zip]

## Sheet: Feuil1
									Appendix 1. A set of LA-ICPMS background data tetsed for the approprite model distribution (ordinary Poisson, Gauss) using the Chi-square goodness-of-fit test
RAW BACKGROUND DATA
Table 1. The raw background data for three isotopes from a randomly selected multi-elemental background acquisition obtained using an ELAN
6100 DRC ICPMS operated in the laser ablation regime. Results of the Chi-square goodness-of-fit test for these data are presented in Tables 2-4.
		93Nb (20 ms dwell time)		23Na (10 ms dwell time)		29Si (10 ms dwell time)
time (s)	sweep number	intensity, cps	count number	intensity, cps	count number	intensity, cps	count number
2.444	1	0	0	4201	42	139766	1398
3.052	2	50	1	3300	33	131849	1318
3.661	3	0	0	3601	36	135807	1358
4.27	4	0	0	4501	45	135096	1351
4.879	5	0	0	3901	39	132661	1327
5.488	6	0	0	4801	48	130835	1308
6.097	7	0	0	4401	44	137025	1370
6.706	8	0	0	3100	31	127893	1279
7.315	9	0	0	3601	36	138040	1380
7.924	10	0	0	3701	37	152468	1525
8.533	11	0	0	3401	34	138954	1390
9.142	12	0	0	4501	45	142000	1420
9.751	13	50	1	4001	40	152875	1529
10.36	14	0	0	5001	50	128198	1282
10.969	15	0	0	4101	41	135096	1351
11.578	16	0	0	2600	26	129110	1291
12.187	17	0	0	3501	35	140274	1403
12.796	18	0	0	3701	37	133473	1335
13.405	19	0	0	4801	48	137939	1379
14.014	20	0	0	3701	37	124851	1249
14.623	21	0	0	3801	38	134995	1350
15.232	22	0	0	3601	36	140172	1402
15.841	23	0	0	3701	37	133777	1338
16.45	24	0	0	4101	41	138751	1388
17.059	25	0	0	3901	39	136619	1366
17.668	26	0	0	4201	42	133980	1340
18.277	27	0	0	3100	31	132052	1321
18.886	28	0	0	3801	38	139259	1393
19.495	29	0	0	3401	34	131342	1313
20.104	30	0	0	3801	38	144946	1449
20.713	31	0	0	3501	35	128603	1286
21.322	32	0	0	3801	38	131849	1318
21.931	33	0	0	2800	28	125054	1251
22.54	34	0	0	3601	36	135807	1358
23.149	35	0	0	3901	39	131748	1317
23.758	36	0	0	3701	37	131342	1313
24.367	37	0	0	2800	28	130530	1305
24.976	38	0	0	5301	53	129415	1294
25.585	39	0	0	3401	34	137431	1374
26.194	40	0	0	2900	29	126068	1261
26.803	41	0	0	3901	39	139563	1396
27.412	42	0	0	3401	34	134386	1344
28.021	43	0	0	3200	32	131545	1315
28.63	44	0	0	3300	33	131139	1311
29.239	45	0	0	4001	40	124750	1248
29.848	46	0	0	3300	33	129922	1299
30.456	47	0	0	4801	48	127995	1280
31.066	48	0	0	2800	28	139360	1394
31.674	49	0	0	5001	50	134690	1347
32.284	50	0	0	4001	40	131443	1314
32.893	51	0	0	3901	39	132864	1329
33.501	52	0	0	3401	34	133067	1331
34.111	53	0	0	2900	29	132255	1323
34.719	54	0	0	3200	32	127691	1277
35.329	55	0	0	4001	40	128908	1289
35.937	56	0	0	4001	40	128502	1285
36.546	57	0	0	3701	37	134183	1342
37.155	58	0	0	4201	42	131748	1317
37.764	59	0	0	5401	54	139259	1393
38.373	60	0	0	3501	35	128400	1284
38.982	61	0	0	3601	36	138243	1382
39.591	62	0	0	3100	31	135401	1354
40.2	63	0	0	2900	29	133879	1339
40.809	64	0	0	3701	37	131443	1314
41.418	65	0	0	3901	39	131545	1315
42.027	66	0	0	3000	30	127488	1275
42.636	67	0	0	4301	43	131545	1315
43.245	68	0	0	3000	30	131545	1315
43.854	69	50	1	3801	38	132255	1323
44.463	70	0	0	3701	37	136111	1361
45.072	71	0	0	3701	37	144337	1443
45.681	72	0	0	4401	44	135502	1355
46.29	73	0	0	4201	42	136822	1368
46.899	74	0	0	4401	44	130632	1306
47.508	75	0	0	4301	43	134082	1341
48.117	76	0	0	4101	41	121101	1211
48.726	77	0	0	3200	32	141899	1419
49.335	78	0	0	3100	31	127995	1280
49.944	79	0	0	2900	29	137329	1373
50.553	80	0	0	4001	40	125257	1253
51.162	81	0	0	4501	45	137228	1372
51.771	82	0	0	3300	33	131748	1317
52.38	83	0	0	2700	27	128400	1284
52.989	84	0	0	3801	38	121304	1213
53.598	85	0	0	4801	48	121811	1218
54.207	86	0	0	3801	38	138446	1384
54.816	87	0	0	3000	30	130023	1300
55.425	88	0	0	4601	46	130125	1301
56.034	89	0	0	3501	35	134082	1341
56.643	90	0	0	2600	26	150333	1503
total number of counts			3		3373		120273
CHI-SQUARE GOODNESS-OF-FIT TESTS
Goodness-of-fit tests, such as the Chi-square test, are used to estimate the extent of similarity between the actually observed distribution and a model distribution used for its
approximation. The actually observed distribution is divided in several classes, each of them being characterised by some frequency of appearance. For each of the classes, the
expected frequency is computed using the probability function of the model distribution, and the actually observed frequency of appearance is compared to the expected
frequency. If the difference between them is small, the actual and the model distributions are considered to be sufficiently similar and the model distribution with its standard
deviation can be used to approximate the actual distribution. If it is large, the model distribution cannot be used to describe the actual distribution.
Table 2. Testing a very weak background (93Nb) for the Poisson distribution using the Chi-square test.
Observed and expected frequencies for the different 93Nb count number classes are computed and compared.
count number class,	probability,	expected	observed	E-O	χ2=
ions per sweep	for each class	frequency (E)	frequency (O)		(E-O)2/E
0	0.967219	87.0497	87	0	0
1	0.0322374	2.90137	3	0	0
2	0.000537237	0.0483513	0
3	5.9687e-06	0.000537183	0
Total	1	90	90		0
Mean number of counts per sweep : 3/90=0.03333.
Null hypothesis: the observed distribution of 93Nb counts follows a Poisson distribution with a mean of 0.03333.
χ2=0, the observed and the model distributions are indistinguishable; the null hypothesis is accepted at any confidence level.
The actual distribution can be considered as an ordinary Poisson distribution at any confidence level.
Table 3a. Testing a background of moderate intensity (23Na) for the Poisson distribution using the Chi-square test. Observed and expected frequencies for the different 23Na count
number classes are computed and compared (see also Fig. 1a,b).
	range of counts		Poisson distribution			observed	observed		χ2=
count number class	in each of the	probability,	expected	corrected	expected	frequency	frequency,	E-O	(E-O)2/E
	classes	for each class	frequency	classes	frequency,		corrected
					corrected (E)		(O)
1	≤ 24	0.0127079	1.14371			0
2	25-26	0.0184057	1.65652			0
3	27-28	0.0352738	3.17464			2
4	29-30	0.0586878	5.2819	≤ 30	11	4	6	5	2.27273
5	31-32	0.0855597	7.70037	31-32	8	7	7	1	0.125
6	33-34	0.110192	9.91727	33-34	10	7	7	3	0.9
7	35-36	0.126274	11.3646	35-36	11	9	9	2	0.363636
8	37-38	0.12958	11.6622	37-38	12	9	9	3	0.75
9	39-40	0.119762	10.7786	39-40	11	16	16	-5	2.27273
10	41-42	0.100208	9.01874	41-42	9	12	12	-3	1
11	43-44	0.0762648	6.86383	43-44	7	7	7	0	0
12	45-46	0.0530193	4.77173	45-46	5	5	5	0	0
13	47-48	0.0338006	3.04206	47-48	3	4	4	-1	0.333333
14	49-50	0.0198313	1.78482	≥ 49	3	4	8	-5	8.33333
15	51-52	0.0107434	0.96691			2
16	53-54	0.00539042	0.485138			0
17	55-56	0.00251196	0.226077			2
18	≥ 57	0.00178711	0.16084			0
Total		1	90		90	90	90		16.3508
Mean number of counts per sweep : 3373/90=37.4778.
Null hypothesis: the observed distribution of 23Na counts follows a Poisson distribution with a mean of 37.4778.
Number of classes: 11; degrees of freedom: 11-2-1=8; critical χ2 value for a 90% level of confidence: 20.09; calculated χ2 value: 16.35; the null hypothesis is accepted.
The actual distribution can be considered as (approximated by) an ordinary Poisson distribution at a 90% level of confidence.
Table 3b. Testing a background of moderate intensity (23Na) for the Gauss distribution using the Chi-square test. Observed and expected frequencies for the different 23Na count
number classes are computed and compared (see also Fig. 1a,c).
	range of counts		Gauss distribution			observed	observed		χ2=
count number class	in each of the	probability,	expected	corrected	expected	frequency	frequency,	E-O	(E-O)2/E
	classes	for each class	frequency	classes	frequency,		corrected
					corrected (E)		(O)
1	≤ 24	0.0179931	1.61938			0
2	25-26	0.0200465	1.80418			0
3	27-28	0.0353889	3.185			2
4	29-30	0.056328	5.06952	≤ 30	12	4	6	6	3
5	31-32	0.0808372	7.27535	31-32	7	7	7	0	0
6	33-34	0.1046	9.41396	33-34	9	7	7	2	0.444444
7	35-36	0.122034	10.9831	35-36	11	9	9	2	0.363636
8	37-38	0.12837	11.5533	37-38	12	9	9	3	0.75
9	39-40	0.121754	10.9578	39-40	11	16	16	-5	2.27273
10	41-42	0.10412	9.37078	41-42	9	12	12	-3	1
11	43-44	0.0802817	7.22535	43-44	7	7	7	0	0
12	45-46	0.0558125	5.02312	45-46	5	5	5	0	0
13	47-48	0.0349845	3.1486	47-48	3	4	4	-1	0.333333
14	49-50	0.0197719	1.77947	≥ 49	3	4	8	-5	8.33333
15	51-52	0.010075	0.906753			2
16	53-54	0.0046288	0.416592			0
17	55-56	0.00191739	0.172565			2
18	≥ 57	0.00105676	0.0951086			0
Total			90	90		90	90	90	16.4975
Mean number of counts per sweep : 3373/90=37.4778, the (per-sweep) standard deviation: 6.1885.
Null hypothesis: the observed distribution of 23Na counts follows a Gauss distribution with a mean of 37.4778 and a standard deviation of 6.1885.
Number of classes: 11; degrees of freedom: 11-2-1=8; critical χ2 value for a 90% level of confidence: 20.09; calculated χ2 value: 16.50; the null hypothesis is accepted.
The distribution can be considered as (approximated by) a Gauss distribution at a 90% level of confidence.
Table 4a. Testing a strong background (29Si) for the Poisson distribution using the Chi-square test. Observed and expected frequencies for the different 29Si count number classes
are computed and compared (see also Fig. 2a,b).
	range of counts		Poisson distribution			observed	observed		χ2=
count number class	in each of the	probability,	expected	corrected	expected	frequency	frequency,	E-O	(E-O)2/E
	classes	for each class	frequency	classes	frequency,		corrected
					corrected (E)		(O)
1	≤ 1200	7.88252e-05	0.00709427			0
2	1201-1220	0.000577165	0.0519448			0
3	1221-1240	0.0033561	0.302049			3
4	1241-1260	0.0142183	1.27965			0
5	1261-1280	0.0441141	3.97027	≤ 1280	5	4	7	-2	0.8
6	1281-1300	0.10073	9.0657	1281-1300	9	6	6	3	1
7	1301-1320	0.170073	15.3066	1301-1320	15	10	10	5	1.66667
8	1321-1340	0.213285	19.1957	1321-1340	19	18	18	1	0.0526316
9	1341-1360	0.199526	17.9573	1341-1360	18	10	10	8	3.55556
10	1361-1380	0.13981	12.5829	1361-1380	13	12	12	1	0.0769231
11	1381-1400	0.07367	6.6303	1381-1400	7	9	9	-2	0.571429
12	1401-1420	0.0293021	2.63719	≥ 1401	4	9	18	-14	49
13	1421-1440	0.00882974	0.794676			4
14	1441-1460	0.00202287	0.182058			0
15	1461-1480	0.00035354	0.0318186			2
16	1481-1500	4.72934e-05	0.00425641			0
17	1501-1520	4.85795e-06	0.000437216			0
18	1521-1540	3.84382e-07	3.45944e-05			1
19	1541-1560	2.34999e-08	2.11499e-06			2
20	≥ 1561	1.15565e-09	1.04008e-07			0
Total		1	90		90	90	90		56.7232
Mean number of counts per sweep : 120273/90=1336.4
Null hypothesis: the observed distribution of 29Si counts follows a Poisson distribution with a mean of 1336.4
Number of classes: 8; degrees of freedom: 8-2-1=5; critical χ2 value for a 90% level of confidence: 15.09; calculated χ2 value: 56.72; the null hypothesis is rejected.
The actual distribution cannot be considered as an ordinary Poisson distribution at a 90% level of confidence (and at any other practically applicable level of confidence).
Table 4b. Testing a strong background (29Si) for the Gauss distribution using the Chi-square test. Observed and expected frequencies for the different 29Si count number classes
are computed and compared (see also Fig. 2a,c).
	range of counts		Gauss distribution			observed	observed		χ2=
count number class	in each of the	probability,	expected	corrected	expected	frequency	frequency,	E-O	(E-O)2/E
	classes	for each class	frequency	classes	frequency,		corrected
					corrected (E)		(O)
1	≤ 1200	0.0115718	1.04146			0
2	1201-1220	0.0148112	1.33301			0
3	1221-1240	0.0281278	2.5315			3
4	1241-1260	0.04782	4.3038			0
5	1261-1280	0.0727805	6.55025	≤ 1280	16	4	7	9	5.0625
6	1281-1300	0.0991641	8.92477	1281-1300	9	6	6	3	1
7	1301-1320	0.120956	10.8861	1301-1320	11	10	10	1	0.0909091
8	1321-1340	0.132081	11.8873	1321-1340	12	18	18	-6	3
9	1341-1360	0.129118	11.6206	1341-1360	12	10	10	2	0.333333
10	1361-1380	0.112998	10.1698	1361-1380	10	12	12	-2	0.4
11	1381-1400	0.0885297	7.96767	1381-1400	8	9	9	-1	0.125
12	1401-1420	0.062093	5.58837	1401-1420	6	9	9	-3	1.5
13	1421-1440	0.0389878	3.5089	1421-1440	4	4	4	0	0
14	1441-1460	0.0219152	1.97237	≥ 1441	3	0	5	-2	1.33333
15	1461-1480	0.0110278	0.992505			2
16	1481-1500	0.00496774	0.447097			0
17	1501-1520	0.00200331	0.180298			0
18	1521-1540	0.000723192	0.0650873			1
19	1541-1560	0.000233706	0.0210336			2
20	≥ 1561	9.02017e-05	0.00811815			0
Total		1	90		90	90	90		12.8451
Mean number of counts per sweep : 120273/90=1336.4, the (per-sweep) standard deviation: 59.84.
Null hypothesis: the observed distribution of 29Si counts follows a Gauss distribution with a mean of 1336.4 and a standard deviation of 59.84.
Number of classes: 10; degrees of freedom: 10-2-1=7; critical χ2 value for a 90% level of confidence: 18.48; calculated χ2 value: 12.85; the null hypothesis is accepted.
The actual distribution can be considered as (approximated by) an ordinary Poisson distribution at a 90% level of confidence.
