# Supplementary material for: Detection in LA-ICPMS: construction and performance evaluation of decision rules
Source: Royal Society of Chemistry journal article supplement (doi:10.1039/c5ja00378d), 2016-01-01
Supplement: c5ja00378d1.zip [file c5ja00378d1.zip]

**Appendix 4.** Deriving the  $\sqrt{N_s+N_b}$  rule from the  $\sqrt{2N_b}$  rule:

We assume that we know  $N_b$  as an estimate of the mean background activity; the critical level is given as follows:

$$L_c = (N_s - N_b)_c = k_\alpha \sqrt{2N_b}$$

Consequently, a gross signal activity amounting to  $N_b + k_\alpha \sqrt{2N_b}$  is not yet detected (although any gross signal activity larger then this is detected). Now, we have two background estimates:  $N_b$  and  $N_b + k_\alpha \sqrt{2N_b}$ .

Accordingly, the mean background value is estimated as  $\frac{N_b + N_b + k_\alpha \sqrt{2N_b}}{2} = N_b + \frac{k_\alpha}{2} \sqrt{2N_b}$

For the critical level, we now obtain:  $L_c = (N_s - N_b)_c = k_\alpha \sqrt{2 \left( N_b + \frac{k_\alpha}{2} \sqrt{2N_b} \right)} = k_\alpha \sqrt{2N_b + k_\alpha \sqrt{2N_b}}$

Since now, the problem allows for a convergent iterative solution. We have the following background estimates:

$N_b$  and  $N_b + k_\alpha \sqrt{2N_b + k_\alpha \sqrt{2N_b}}$ . The mean background value is estimated as

$$\frac{N_b + N_b + k_\alpha \sqrt{2N_b + k_\alpha \sqrt{2N_b}}}{2} = N_b + \frac{k_\alpha}{2} \sqrt{2N_b + k_\alpha \sqrt{2N_b}}$$

For the critical value, we obtain:

$$L_c = (N_s - N_b)_c = k_\alpha \sqrt{2 \left( N_b + \frac{k_\alpha}{2} \sqrt{2N_b + k_\alpha \sqrt{2N_b}} \right)} = k_\alpha \sqrt{2N_b + k_\alpha \sqrt{2N_b + k_\alpha \sqrt{2N_b}}}$$

etc.

In the end, we have to calculate the critical level from a infinite radical:

$$L_c = k_\alpha \sqrt{2N_b + k_\alpha \sqrt{2N_b + k_\alpha \sqrt{2N_b + k_\alpha \sqrt{2N_b + k_\alpha \dots}}}}$$

Finding the limit of this radical is a simple arithmetic exercise:

$$L_c^2 = k_\alpha^2 \left[ 2N_b + k_\alpha \sqrt{2N_b + k_\alpha \sqrt{2N_b + k_\alpha \sqrt{2N_b + k_\alpha \dots}}} \right] = 2k_\alpha^2 N_b + k_\alpha^2 L_c$$

$$L_c^2 - k_\alpha^2 L_c - 2k_\alpha^2 N_b = 0 \Rightarrow L_c = \frac{k_\alpha^2 + \sqrt{k_\alpha^4 + 8k_\alpha^2 N_b}}{2} = \frac{k_\alpha^2}{2} + k_\alpha \sqrt{\frac{k_\alpha^2}{4} + 2N_b}$$
