# Supplementary material for: Detection in LA-ICPMS: construction and performance evaluation of decision rules
Source: Royal Society of Chemistry journal article supplement (doi:10.1039/c5ja00378d), 2016-01-01
Supplement: c5ja00378d1.zip [file c5ja00378d1.zip]

**Appendix 3.** A proof of the unity standard deviation for the  $\frac{N_s - N_b}{\sqrt{2N_b}}$  statistic under the null hypothesis  $\overline{N_s} = \overline{N_b}$  ( $\overline{N_s - N_b} = 0$ )

Considering the above statistic as a function of two variables,  $N_s - N_b$  and  $N_b$ , and propagating its uncertainty in the vicinity of point  $(\overline{N_s - N_b}, \overline{N_b})$ , we obtain:

$$Var\left(\frac{N_s - N_b}{\sqrt{2N_b}}\right) \bigg|_{\substack{\overline{N_s - N_b} \\ \overline{N_b}}} = \frac{1}{2N_b} Var(N_s - N_b) + \frac{(N_s - N_b)^2}{4N_b^2} Var(\sqrt{2N_b}) - 2 \frac{N_s - N_b}{(2N_b)^{3/2}} Cov(N_s - N_b, \sqrt{2N_b}) \bigg|_{\substack{\overline{N_s - N_b} \\ \overline{N_b}}}$$

At  $\overline{N_s} = \overline{N_b}$ , or  $\overline{N_s - N_b} = 0$ , the last two terms in the right-hand part of this equation can be omitted. Hence,

$$Var\left(\frac{N_s - N_b}{\sqrt{2N_b}}\right) \bigg|_{\substack{\overline{N_s - N_b} \\ \overline{N_b}}} = \frac{1}{2N_b} Var(N_s - N_b) \bigg|_{\substack{\overline{N_s - N_b} \\ \overline{N_b}}} = \frac{\overline{N_s + N_b}}{2N_b} = 1 \bigg|_{\overline{N_s = N_b}}$$
